# Supplementary material for: Antioxidant supplements promote tumor formation and growth and confer drug resistance in hepatocellular carcinoma by reducing intracellular ROS and induction of TMBIM1
Source: PubMed Central journal article supplement (PMC8684635; doi:10.1186/s13578-021-00731-0), 2021-12-19

# Supplementary Figure 1

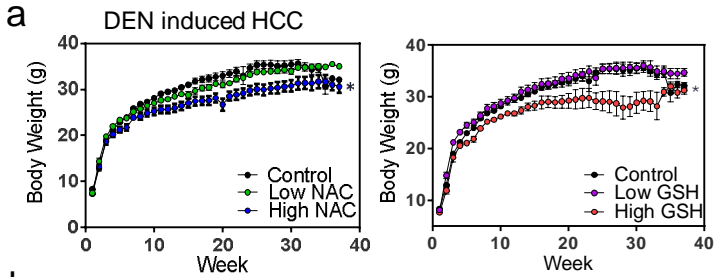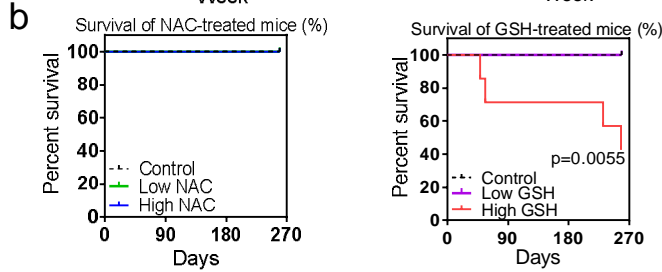

**c** The hydrodynamic tail vein injection-induced HCC

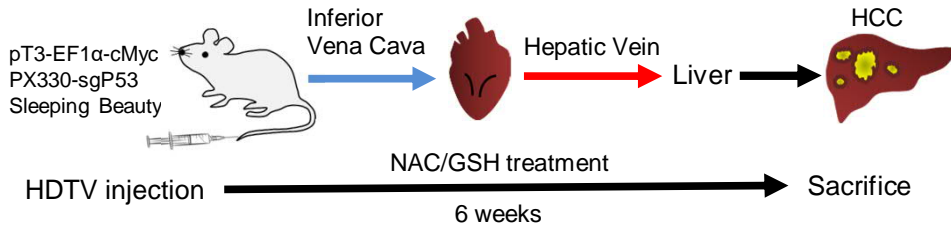

**d** Hydrodynamic tail vein injection (p53 KO/c-Myc)  
NAC/GSH treatment  
6 weeks  
Tumor incidence rate

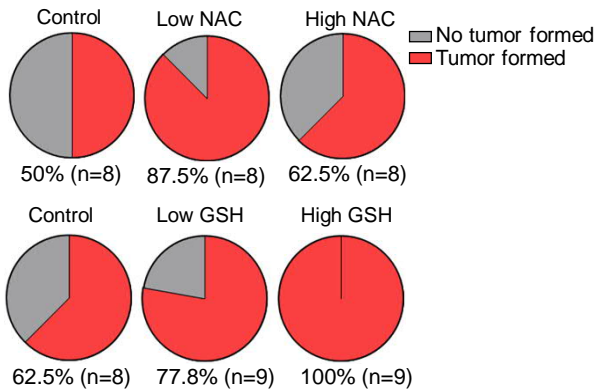

**e**

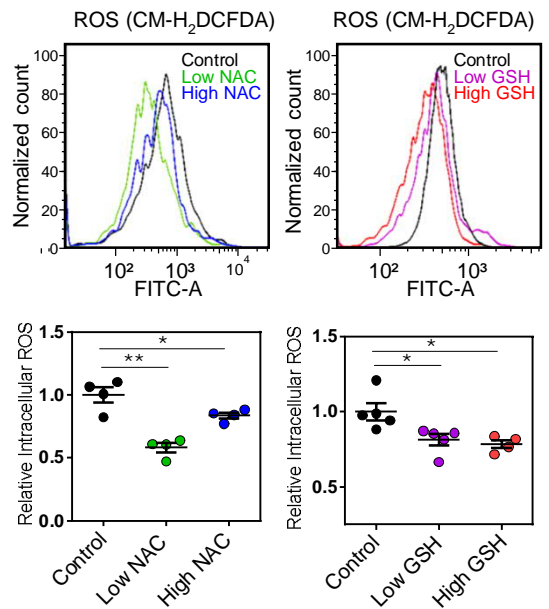

# Supplementary Figure 2

## a Colony formation assay

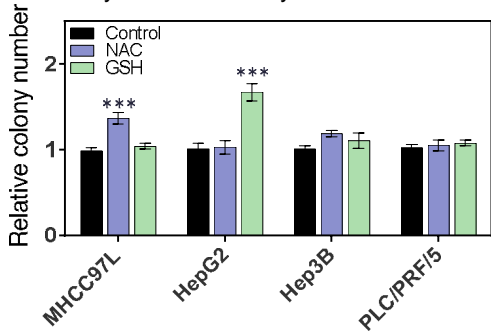

## b Cell proliferation assay

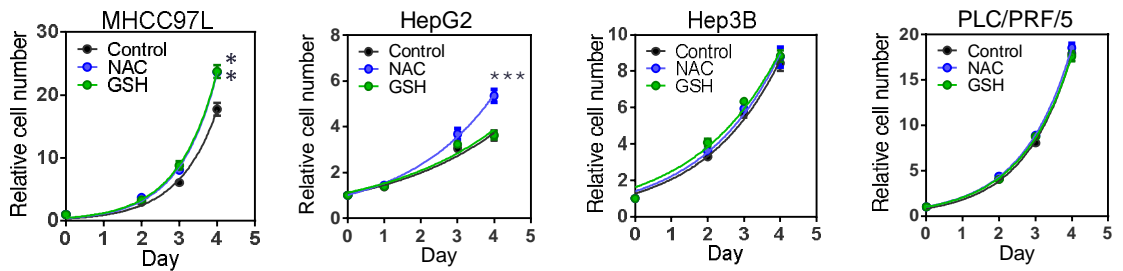

## c Sphere formation assay

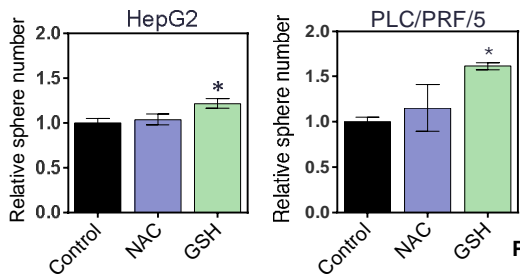

## d Sphere formation assay

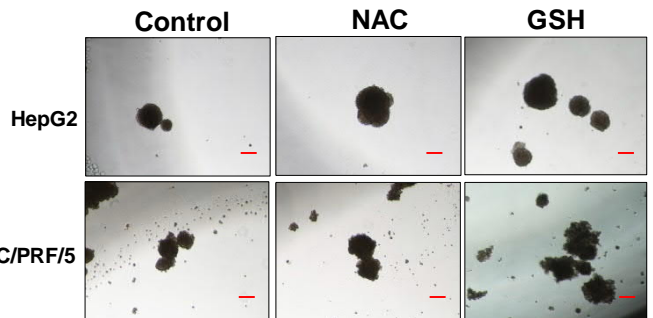

## e qPCR MHCC97L cells

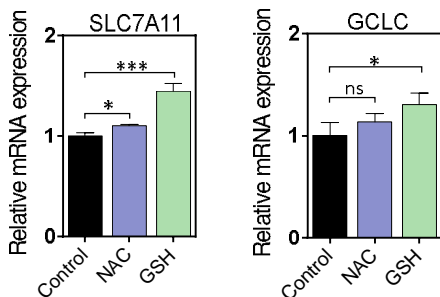

# Supplementary Figure 3

## a Orthotopic liver injection NAC treatment

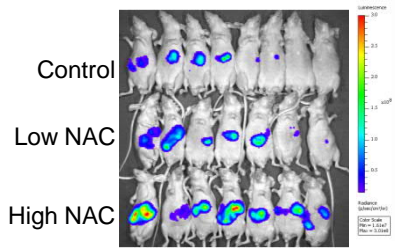

## b Control Low NAC High NAC

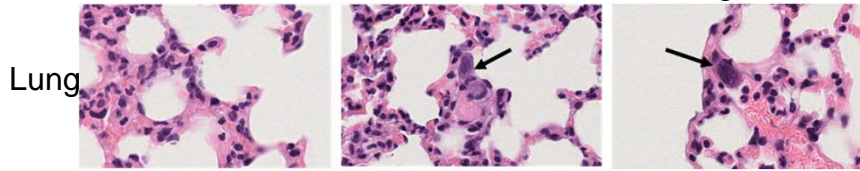

The metastatic foci

| Control    | Low NAC      | High NAC     |
|------------|--------------|--------------|
| 0.23 (0-1) | 0.37 (0-1.8) | 0.22 (0-1.1) |

## c Orthotopic liver injection GSH treatment

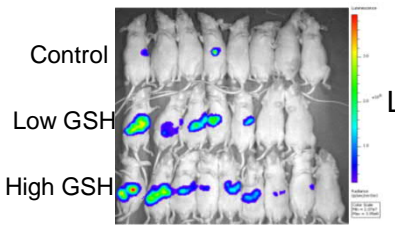

## d Control Low GSH High GSH

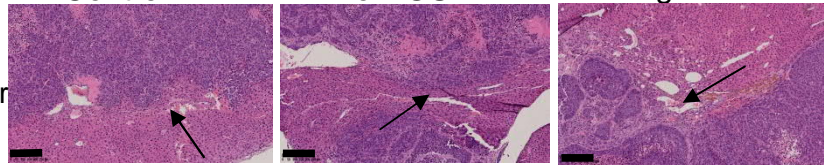

## e

| Tumor incidence rate |                          | Control | Low NAC | High NAC |
|----------------------|--------------------------|---------|---------|----------|
| MHCC97L cells        | Number of cells injected |         |         |          |
|                      | 2,000                    | 4/8     | 6/8     | 4/8      |
| Frequency            | 20,000                   | 4/8     | 6/8     | 7/8      |
|                      | 200,000                  | 7/8     | 8/8     | 8/8      |

| Tumor incidence rate |                          | Control | Low GSH | High GSH |
|----------------------|--------------------------|---------|---------|----------|
| MHCC97L cells        | Number of cells injected |         |         |          |
|                      | 2,000                    | 4/8     | 5/8     | 7/8      |
| Frequency            | 20,000                   | 6/8     | 7/8     | 8/8      |
|                      | 200,000                  | 7/8     | 7/8     | 8/8      |

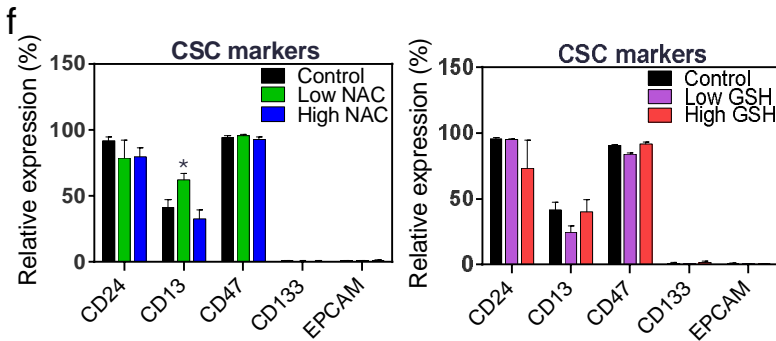

## g CD44 mRNA expression in mice orthotopic liver injection tumors

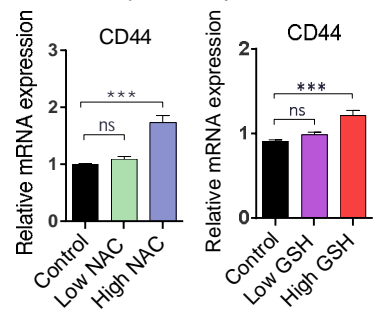

# Supplementary Figure 4

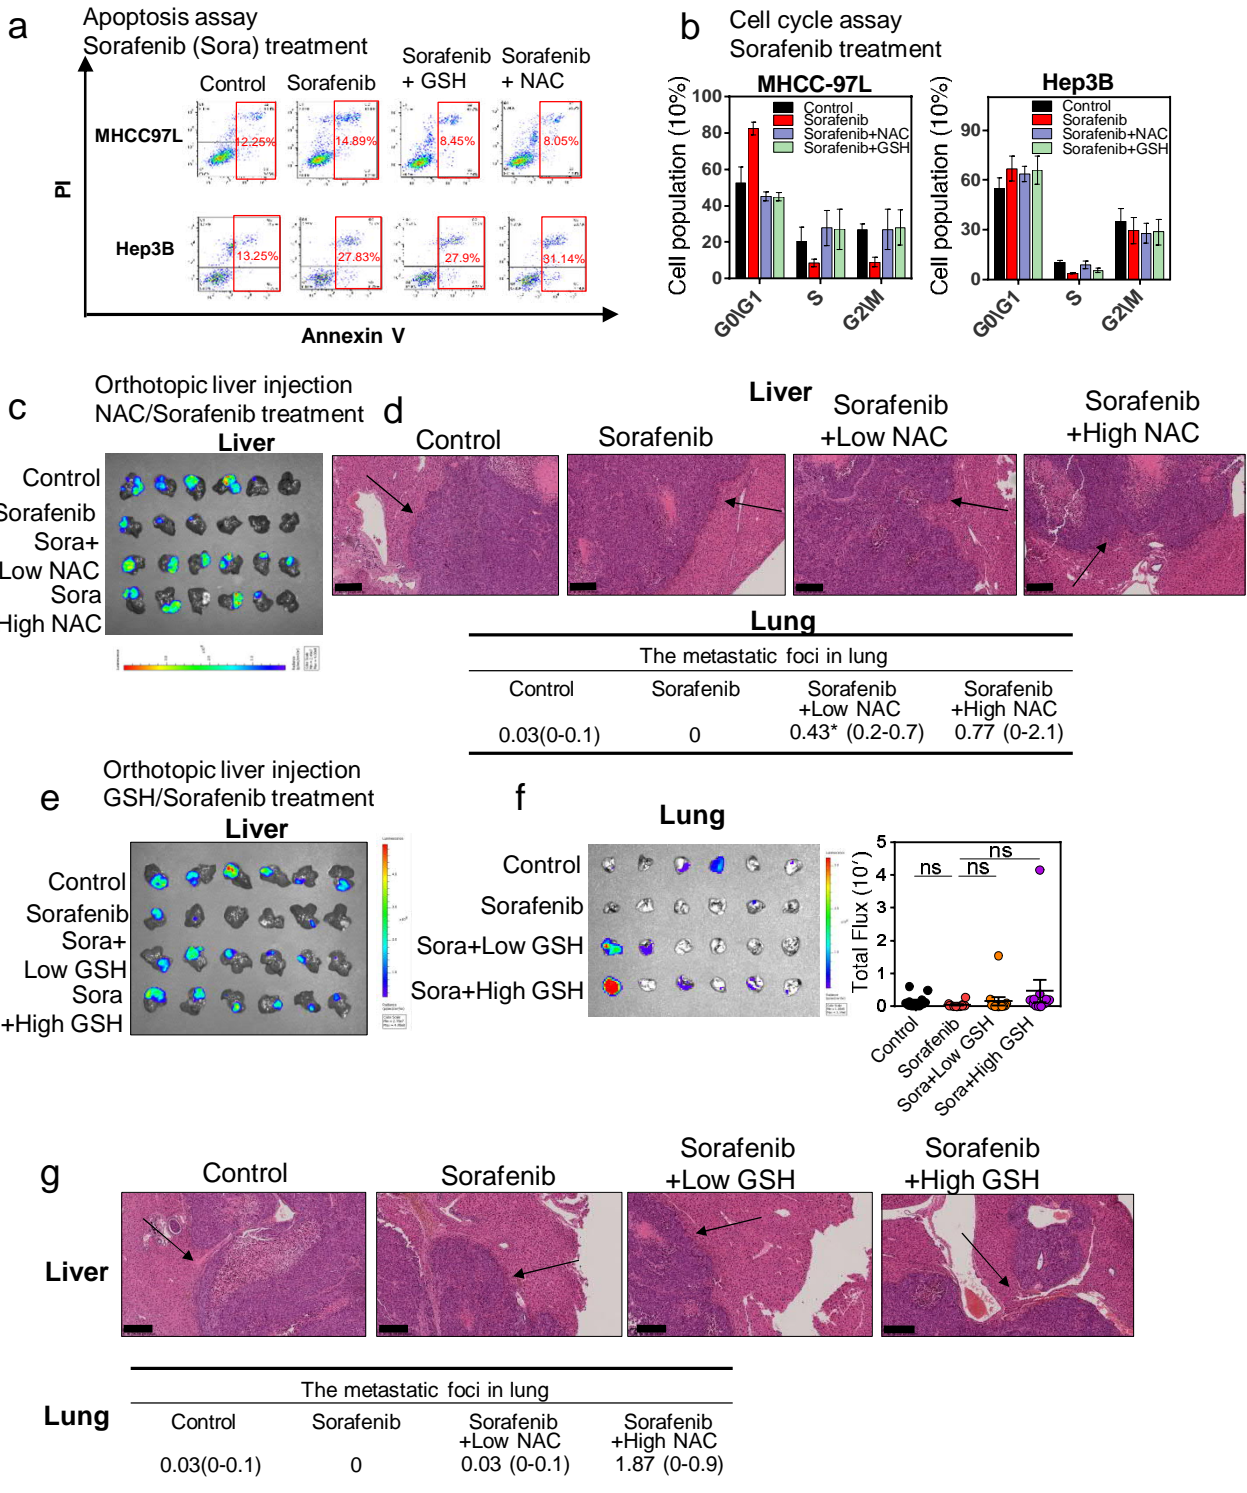

# Supplementary Figure 5

a

RNA-seq  
MHCC97L cells

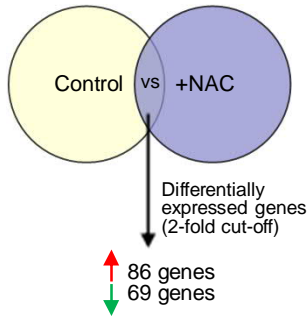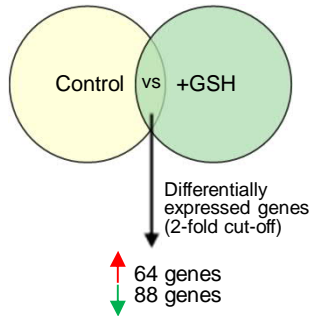

b RNA-seq  
MHCC97L cells

GO biological process: upregulated genes by NAC

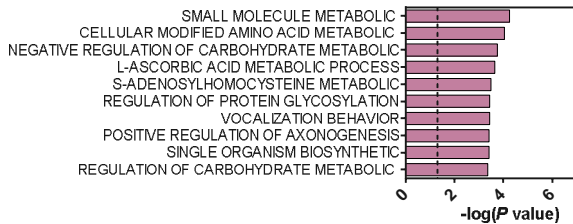

GO biological process: upregulated genes by GSH

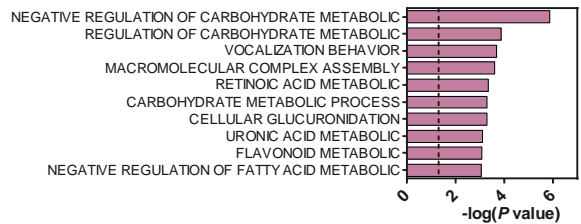

c

GO biological process: down-regulated genes by NAC

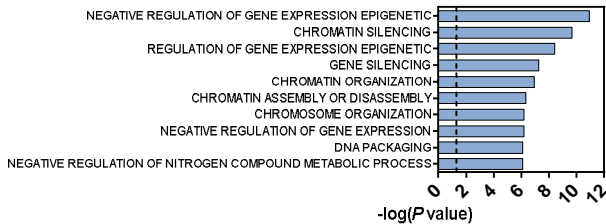

GO biological process: down-regulated genes by GSH

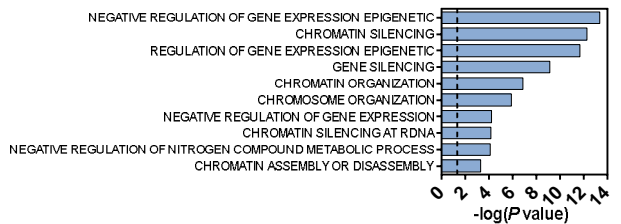

# Supplementary Figure 6

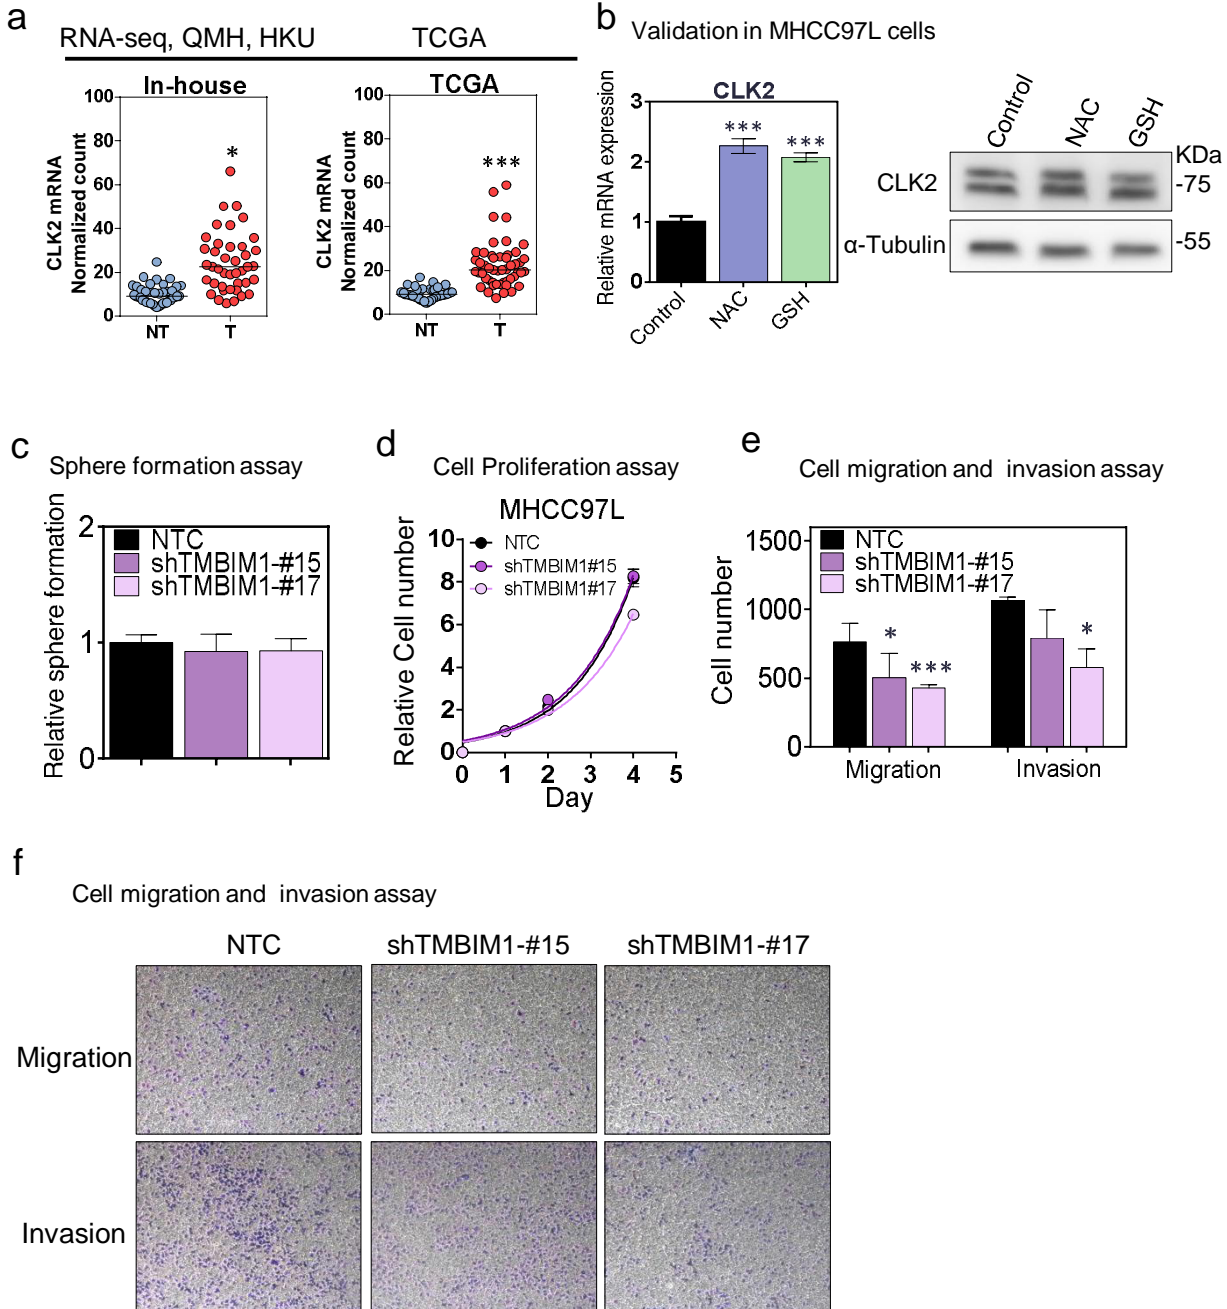



# Supplementary Figure 7

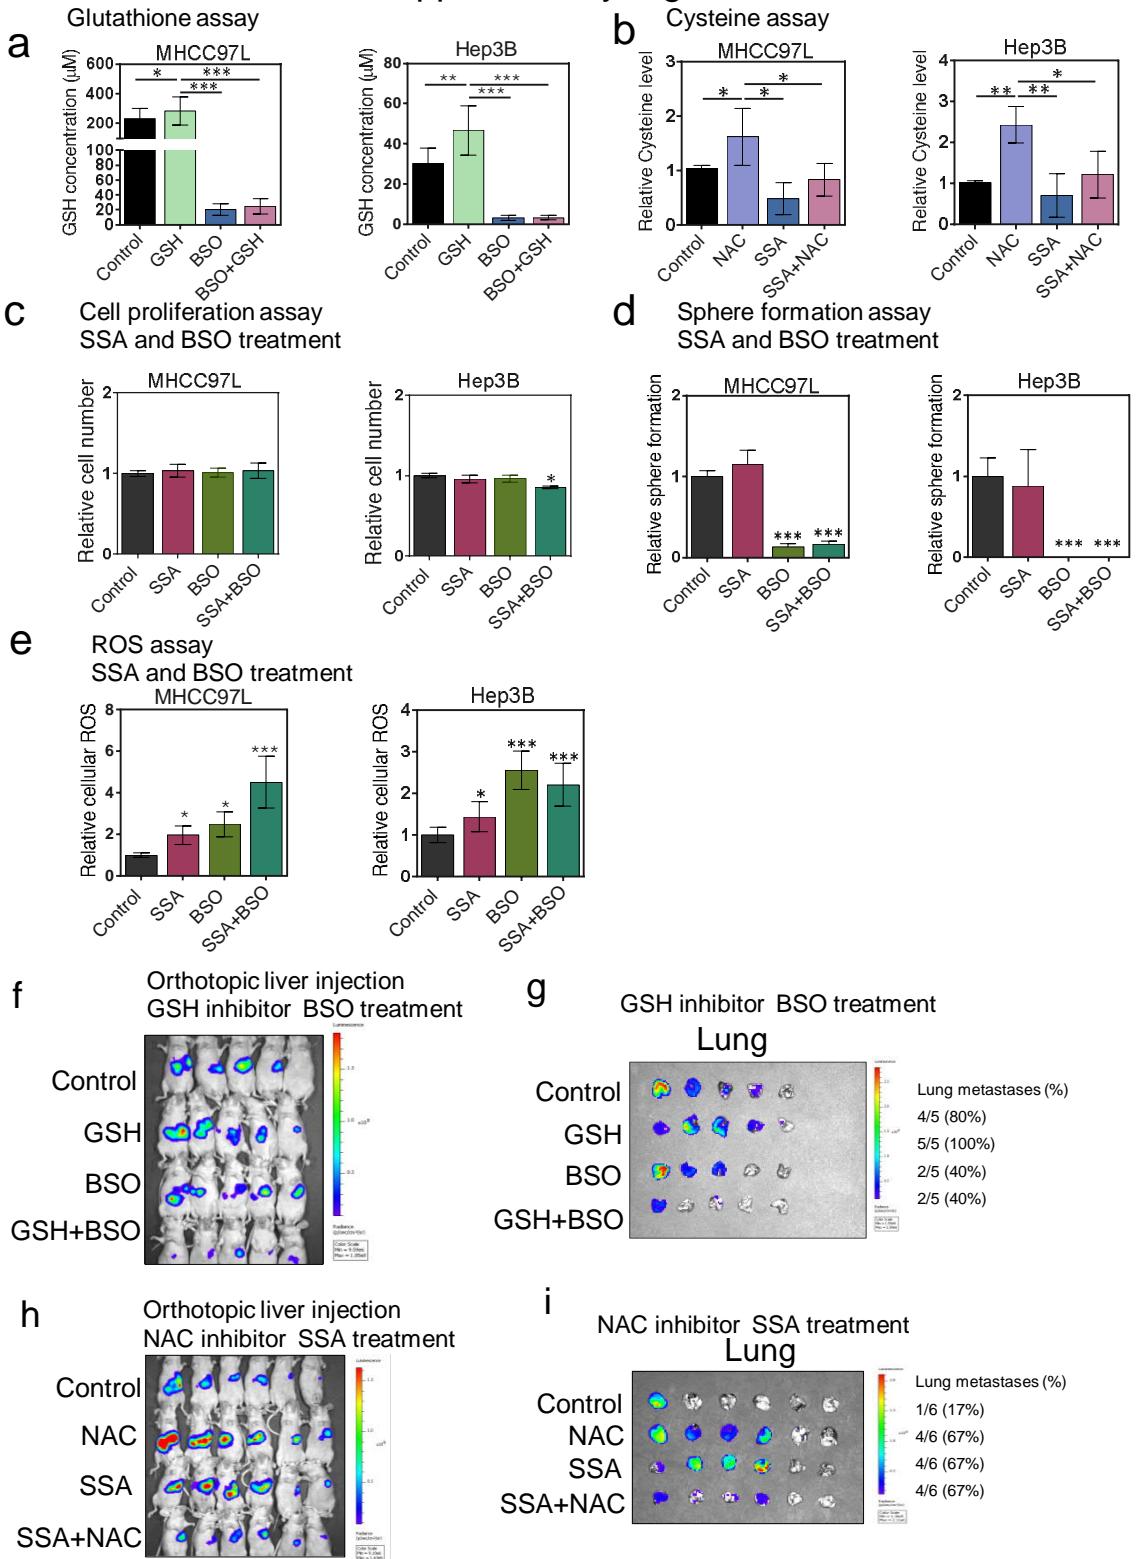

# Supplementary Figure 8

a

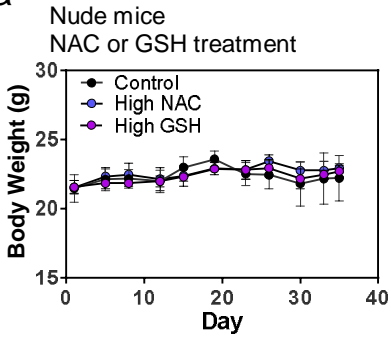

b

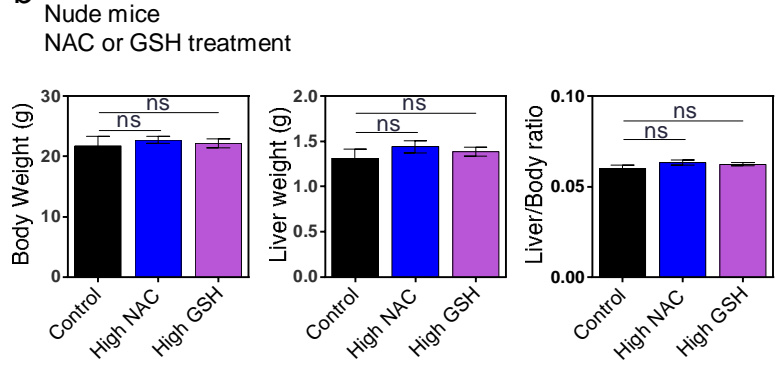

c

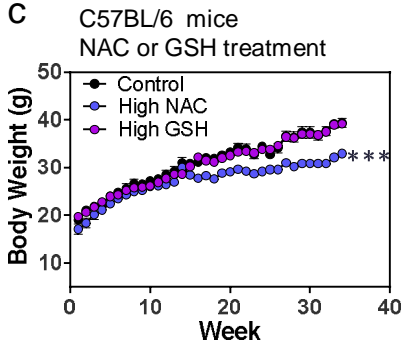

d

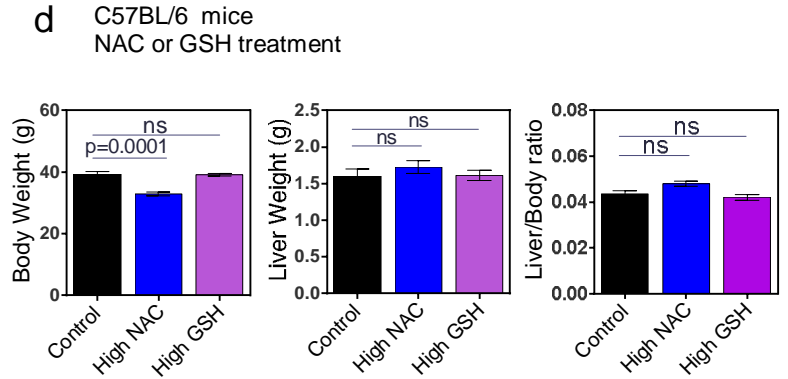



## Supplementary Figure 9

| Test Results: | DNA Marker                                       | MHCC97L <sup>4</sup> | MHCC97L<br>(L-171218744P) |
|---------------|--------------------------------------------------|----------------------|---------------------------|
|               |                                                  | AMEL                 | X, Y                      |
|               | CSFIPO                                           | 11, 13               | 11, 13                    |
|               | D13S317                                          | 8                    | 8                         |
|               | D16S539                                          | 12                   | 12                        |
|               | D5S818                                           | 12,13                | 12,13                     |
|               | D7S820                                           | 10                   | 10                        |
|               | TH01                                             | 9                    | 9                         |
|               | TPOX                                             | 8                    | 8                         |
|               | vWA                                              | 14                   | 14                        |
|               | D18S51                                           | --                   | 13, 22                    |
|               | D21S11                                           | --                   | 31,2                      |
|               | D3S1358                                          | --                   | 15, 16                    |
|               | D8S1179                                          | --                   | 12, 13                    |
|               | FGA                                              | --                   | 21, 24                    |
|               | Penta D                                          | --                   | 8, 9                      |
|               | Penta E                                          | --                   | 11, 17                    |
|               | Number of shared alleles                         |                      | 12                        |
|               | Total number of alleles in the reference profile |                      | 12                        |
|               | Percent match                                    |                      | 100%                      |

**Comment:** The tested cell line has 100% match with MHCC97L. Therefore, they are considered to be related from a common ancestry.

**Figure S9. STR authentication of MHCC-97L cells.**

# Supplementary Figure 10

**a** Cell proliferation assay  
Sorafenib, SSA and BSO treatment

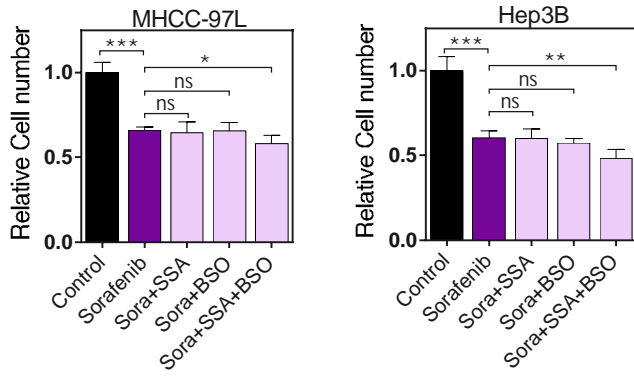

Supplement: 13578_2021_731_MOESM1_ESM.pdf [file 13578_2021_731_MOESM1_ESM.pdf]
